# Supplementary material for: Targeting CD44 Variant 5 with an Antibody–Drug Conjugate Is an Effective Therapeutic Strategy for Intrahepatic Cholangiocarcinoma
Source: Oxford University Press journal article supplement (doi:10.1158/0008-5472.can-23-0510), 2023-05-19
Supplement: can-23-0510_supplementary_table_2_suppst2.xlsx [file can-23-0510_supplementary_table_2_suppst2.xlsx]

## Sheet: Sheet1
Table S2: amino acid sequences of mAbs in this study.
1D8 Heavy Chain	MEWELSLIFIFALLKDVQCEVQLLETGGGLVQPGGSRGLSCEGSGFTFSGFWMSWVRQTPGKTLEWIGDINSDGSAMNYAPSIKDRFTIFRDNDKRTLYLQMSNVRSEDTATYFCLVKGFWGQGTLVTVSAAKTTPPSVYPLAPGSAAQTNSMVTLGCLVKGYFPEPVTVTWNSGSLSSGVHTFPAVLQSDLYTLSSSVTVPSSTWPSETVTCNVAHPASSTKVDKKIVPRDCGCKPCICTVPEVSSVFIFPPKPKDVLTITLTPKVTCVVVDISKDDPEVQFSWFVDDVEVHTAQTQPREEQFNSTFRSVSELPIMHQDWLNGKEFKCRVNSAAFPAPIEKTISKTKGRPKAPQVYTIPPPKEQMAKDKVSLTCMITDFFPEDITVEWQWNGQPAENY…
1D8 Light Chain	MMSPAQFLFLLVLWIRETNGDVVMTQSPLTLSVTIGQPASISCKSSQSLLDSNGKTYLNWLLQRPGQSPKRLIYLVSKLDSGVPDRFTGSGSGTDFTLKISRVEAEDLGVYYCWQGTHFPQTFGGGTKLEIKRADAAPTVSIFPPSSEQLTSGGASVVCFLNNFYPKDINVKWKIDGSERQNGVLNSWTDQDSKDSTYSMSSTLTLTKDEYERHNSYTCEATHKTSTSPIVKSFNRNEC
H1D8 Heacy Chain	MEFGLSWVFLVAILKGVQCEVQLLESGGGLVQPGGSLRLSCETSGFTFSGFWMSWVRQPPGKTLVWVGDINSDGSAMNYAPSIKDRFTISRDNSKNTLYLQMRSLRAEDTAVYYCLVKGFWGQGTLVTVSSASTKGPSVFPLAPSSKSTSGGTAALGCLVKDYFPEPVTVSWNSGALTSGVHTFPAVLQSSGLYSLSSVVTVPSSSLGTQTYICNVNHKPSNTKVDKKVEPKSCDKTHTCPPCPAPELLGGPSVFLFPPKPKDTLMISRTPEVTCVVVDVSHEDPEVKFNWYVDGVEVHNAKTKPREEQYNSTYRVVSVLTVLHQDWLNGKEYKCKVSNKALPAPIEKTISKAKGQPREPQVYTLPPSREEMTKNQVSLTCLVKGFYPSDIAVEWESNG…
H1D8 Light Chain	MRLPAQLLGLLMLWVPGSSGDVVMTQSPLSLPVTLGQPASISCKSSQSLLDSNGKTYLNWLLQRPGQSPRRLIYLVSKLDSGVPDRFTGSGSGTDFTLKISRVEAEDLGVYYCWQGTHFPQTFGGGTKLEIKRTVAAPSVFIFPPSDEQLKSGTASVVCLLNNFYPREAKVQWKVDNALQSGNSQESVTEQDSKDSTYSLSSTLTLSKADYEKHKVYACEVTHQGLSSPVTKSFNRGEC
