# Supplementary material for: Targeting CD44 Variant 5 with an Antibody–Drug Conjugate Is an Effective Therapeutic Strategy for Intrahepatic Cholangiocarcinoma
Source: Oxford University Press journal article supplement (doi:10.1158/0008-5472.can-23-0510), 2023-05-19
Supplement: can-23-0510_supplementary_table_s1_suppst1.xlsx [file can-23-0510_supplementary_table_s1_suppst1.xlsx]

## Sheet: Sheet1
Table. S1: Gene signatures correlated with exons of CD44v
Exons	Gene signatures
Exon 1	C7orf52, TFPI2, CD44, IGFL1, GDEP, ZNRF4, SNORA84, RGS21, PRO1768, PDCL2, OR52A5, CLDN17, ACTBL2, CEND1, LINC00922, PSG6, EDN2, PVR, SVEP1, PSG11, C7orf65, TMPRSS11F, NNMT, FOSB, ADD2, CLEC5A, PROK2, RRAD, MGC42105, TGFBR1, XKR3, LTBP4, ADAM12, VLDLR-AS1, NFIL3, TGM5, JMJD1C-AS1, TARSL2, IFFO2, CBLL1, LEPREL1, BARX1, FCAR, LOC284788, KLRC2, SLC16A10, PDCD5, EPHA5, PALM2AKAP2, TEX101, C12orf70, PA…
Exon 2	CD44, C7orf52, TFPI2, IGFL1, CEND1, GDEP, ZNRF4, SNORA84, RGS21, PRO1768, PDCL2, OR52A5, CLDN17, LINC00922, ACTBL2, EDN2, PSG6, PVR, SVEP1, TMPRSS11F, PSG11, C7orf65, NNMT, FOSB, ADD2, CLEC5A, RRAD, PROK2, MGC42105, TGFBR1, XKR3, LTBP4, ADAM12, LEPREL1, BARX1, TGM5, VLDLR-AS1, JMJD1C-AS1, NFIL3, SLC16A10, TARSL2, IFFO2, FCAR, CBLL1, KLRC2, RGS1, LOC284788, EPHA5, PALM2-AKAP2, TCP11L1, PALM2AKAP2,…
Exon 3	CD44, C7orf52, TFPI2, CEND1, LINC00922, IGFL1, ZNRF4, SNORA84, RGS21, PRO1768, PDCL2, OR52A5, CLDN17, GDEP, ACTBL2, EDN2, PSG6, PVR, SVEP1, TMPRSS11F, PSG11, C7orf65, NNMT, FOSB, RRAD, CLEC5A, ADD2, TGFBR1, PROK2, MGC42105, LTBP4, XKR3, ADAM12, LEPREL1, BARX1, VLDLR-AS1, JMJD1C-AS1, NFIL3, LOC284788, TGM5, TARSL2, IFFO2, SLC16A10, KLRC2, TCP11L1, CBLL1, FCAR, RGS1, PALM2-AKAP2, EPHA5, NAALAD2, GJ…
Exon 4	CD44, C7orf52, TFPI2, CEND1, LINC00922, IGFL1, GDEP, ZNRF4, SNORA84, RGS21, PRO1768, PDCL2, OR52A5, CLDN17, ACTBL2, EDN2, PSG6, PVR, SVEP1, TMPRSS11F, PSG11, NNMT, C7orf65, RRAD, CLEC5A, ADD2, FOSB, PROK2, TGFBR1, MGC42105, LTBP4, XKR3, ADAM12, LEPREL1, NFIL3, JMJD1C-AS1, LOC284788, VLDLR-AS1, BARX1, IFFO2, TGM5, KLRC2, TARSL2, RGS1, TCP11L1, SLC16A10, FCAR, CBLL1, PALM2-AKAP2, EPHA5, GJA3, PDCD5…
Exon 5	CD44, C7orf52, TFPI2, LINC00922, CEND1, IGFL1, GDEP, ZNRF4, SNORA84, RGS21, PRO1768, PDCL2, OR52A5, CLDN17, ACTBL2, EDN2, PSG6, SVEP1, PVR, PSG11, ADD2, NNMT, RRAD, TMPRSS11F, C7orf65, CLEC5A, XKR3, FOSB, MGC42105, LTBP4, PROK2, TGFBR1, ADAM12, LEPREL1, RGS1, JMJD1C-AS1, NFIL3, KLRC2, TARSL2, VLDLR-AS1, IFFO2, PALM2-AKAP2, TGM5, SLC16A10, LOC284788, LGALS12, BARX1, FCAR, CBLL1, EPHA5, NAALAD2, GJ…
Exon 6	DEFB4A, TBPL2, REG1B, CEL, FAM3D, CALCR, GK2, SLC2A14, EDN3, CA13, BTF3L1, REG1A, MMP3, PGA5, C15orf48, DNAH3, ANKS1B, AGTR2, EGFL6, CELP, KRTAP1-5, CLCA4, REG3G, PTPRR, DQX1, AQP12A, LOC653653, PRSS3, SPINK4, DPEP1, LINC00661, SYTL5, IHH, TSPAN3, DYNLT3, MUCL1, KRT40, HPGD, LMO3, GPR160, RHCE, RFX6, DBX2, AQP12B, THSD7B, CLCA1, PNPLA1, PLBD1, SLC26A3, PHGR1, EPSTI1, CNTFR-AS1, RNF186, CEACAM8, T…
Exon 7	LINC00922, C7orf52, LEPREL1, CD44, EDN2, CSF2, NEGR1, ADAM12, ADM, CEND1, TFPI2, IGFL1, ZNRF4, SNORA84, RGS21, PRO1768, PDCL2, OR52A5, CLDN17, GDEP, ACTBL2, CLEC5A, PROK2, PSG6, PVR, SVEP1, FCAR, BARX1, LRFN5, NNMT, RGS1, PSG11, FOSB, LTBP4, MAP7D2, C15orf48, C7orf65, AREG, MGC42105, GK2, SLC11A1, P2RY2, SLC16A10, SPINT2, RRAD, TMPRSS11F, TGM5, MAP1LC3B2, ADD2, ETHE1, JMJD1C-AS1, HPGDS, LGALS12
Exon 8	NHS, NEGR1, C15orf48, PPP1R2P3, VDR, CSF2, SGK1, CLSTN1, NAALAD2, RNASE1, SERPINB4, LRFN5, CD44, RGS1
Exon 9	NHS, C15orf48, NEGR1, CSF2, PPP1R2P3, VDR, CLSTN1, SGK1, LRFN5, RNASE1, CALY, RGS1, CLCA4, GK2, ETHE1, PELI2, CD44
Exon 10	LINC00922, CD44, LEPREL1, CSF2, C7orf52, ADM, NEGR1, EDN2, LRFN5, ADAM12, AREG, SVEP1, CEND1, RGS1, BARX1, CLEC5A, TFPI2, HPGDS, ACTBL2, IGFL1, ZNRF4, SNORA84, RGS21, PRO1768, PDCL2, OR52A5, CLDN17, GDEP, PROK2, C15orf48, FCAR, SLC11A1, LTBP4, PVR, MAP7D2, PSG6, LGALS12, FOSB, SPINT2, BCL6, SLC16A10, NNMT
Exon 11	LINC00922, C7orf52, CD44, LEPREL1, CSF2, ADM, EDN2, CEND1, TFPI2, ACTBL2, IGFL1, SVEP1, ADAM12, GDEP, ZNRF4, SNORA84, RGS21, PRO1768, PDCL2, OR52A5, CLDN17, NEGR1, BARX1, PVR, CLEC5A, PSG6, PROK2, LTBP4, LRFN5, AREG, FOSB, FCAR, RGS1, NNMT, SLC16A10, MAP7D2, TMPRSS11F, HPGDS, SLC11A1, LGALS12, C7orf65, PSG11, MGC42105, C15orf48, P2RY2, SPINT2, BCL6, RRAD, MAP1LC3B2, PAM, NAALAD2
Exon 12	LINC00922, C7orf52, CD44, PVR, IGFL1, TMPRSS11F, ZNRF4, SNORA84, RGS21, PRO1768, PDCL2, OR52A5, CLDN17, GDEP, CEND1, TFPI2, EDN2, ACTBL2, PSG6, PSG11, LEPREL1, C7orf65, SVEP1, FOSB, BARX1, CLEC5A, NNMT, RRAD, ADM, ADAM12, PROK2, TGM5, MGC42105, TGFBR1, ADD2, LTBP4, VLDLR-AS1, SLC16A10, NFIL3, JMJD1C-AS1, P2RY2, PDCD5, CBLL1, IFFO2, XKR3, FCAR, EPHA5, MAP1LC3B2, TEX101, MAP7D2, TCP11L1
Exon 13	LINC00922, C7orf52, CD44, IGFL1, CEND1, ZNRF4, SNORA84, RGS21, PRO1768, PDCL2, OR52A5, CLDN17, GDEP, TFPI2, PVR, EDN2, TMPRSS11F, ACTBL2, PSG6, PSG11, C7orf65, LEPREL1, RRAD, SVEP1, FOSB, NNMT, CLEC5A, BARX1, ADM, PROK2, ADAM12, ADD2, MGC42105, TGM5, TGFBR1, VLDLR-AS1, NFIL3, LTBP4, JMJD1C-AS1, SLC16A10, PDCD5, IFFO2, CBLL1, XKR3, EPHA5, TEX101, P2RY2, FCAR, LRFN3, PSG10, TARSL2, DUSP1, TCP11L1, …
Exon 14	LINC00922, CD44, C7orf52, CEND1, IGFL1, ZNRF4, SNORA84, RGS21, PRO1768, PDCL2, OR52A5, CLDN17, GDEP, TFPI2, PVR, EDN2, ACTBL2, TMPRSS11F, PSG6, LEPREL1, PSG11, RRAD, C7orf65, ADM, SVEP1, CLEC5A, BARX1, NNMT, FOSB, ADAM12, PROK2, ADD2, MGC42105, TGM5, TGFBR1, LTBP4, JMJD1C-AS1, NFIL3, VLDLR-AS1, SLC16A10, PDCD5, IFFO2, XKR3, FCAR, P2RY2, EPHA5, LGALS12, NAALAD2, CBLL1, MAP1LC3B2, CSF2, TEX101, RGS1
Exon 15	CD44, LINC00922, C7orf52, CEND1, TFPI2, IGFL1, ZNRF4, SNORA84, RGS21, PRO1768, PDCL2, OR52A5, CLDN17, GDEP, ACTBL2, EDN2, SVEP1, PSG6, RRAD, NNMT, ADD2, PSG11, PVR, LEPREL1, CLEC5A, LTBP4, C7orf65, ADAM12, RGS1, TMPRSS11F, MGC42105, XKR3, FOSB, JMJD1C-AS1, TGFBR1, LGALS12, NFIL3, PROK2, VLDLR-AS1, IFFO2, KLRC2, ADM, SLC16A10, NAALAD2, TGM5, PALM2-AKAP2, BARX1, TARSL2, PDCD5, EPHA5, LOC284788, CBL…
Exon 16	CD44, LINC00922, C7orf52, CEND1, TFPI2, IGFL1, GDEP, ZNRF4, SNORA84, RGS21, PRO1768, PDCL2, OR52A5, CLDN17, ACTBL2, EDN2, SVEP1, PSG6, RRAD, ADD2, NNMT, LEPREL1, PSG11, RGS1, CLEC5A, PVR, ADAM12, LTBP4, LGALS12, C7orf65, XKR3, MGC42105, NFIL3, TMPRSS11F, JMJD1C-AS1, FOSB, ADM, PROK2, TGFBR1, IFFO2, KLRC2, VLDLR-AS1, SLC16A10, BARX1, NAALAD2, TGM5, PDCD5, PALM2-AKAP2, TARSL2, EPHA5, GREM1, FCAR, L…
Exon 17	CD44, LINC00922, C7orf52, CEND1, TFPI2, IGFL1, GDEP, ZNRF4, SNORA84, RGS21, PRO1768, PDCL2, OR52A5, CLDN17, ACTBL2, RRAD, EDN2, SVEP1, PSG6, ADD2, NNMT, PSG11, LEPREL1, PVR, RGS1, LTBP4, CLEC5A, C7orf65, XKR3, LGALS12, ADAM12, JMJD1C-AS1, NFIL3, MGC42105, TMPRSS11F, FOSB, IFFO2, KLRC2, VLDLR-AS1, PROK2, TGFBR1, ADM, NAALAD2, TGM5, PDCD5, PALM2-AKAP2, SLC16A10, BARX1, TARSL2, EPHA5, GREM1, CBLL1, …
